# Supplementary material
Source: PubMed Central journal article supplement (PMC7960228)
Supplement: 16-00772.pdf [file 16-00772.pdf]

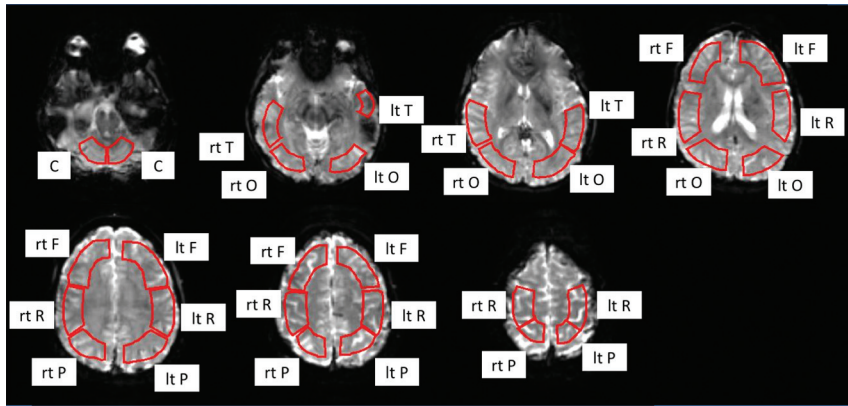

**ON-LINE FIG 1.** Examples of ROIs used for analysis of the same patient in Fig 1. C indicates cerebellum; F, frontal; Lt, left; O, occipital; P, parietal; R, rolandic; rt, right; and T, temporal.

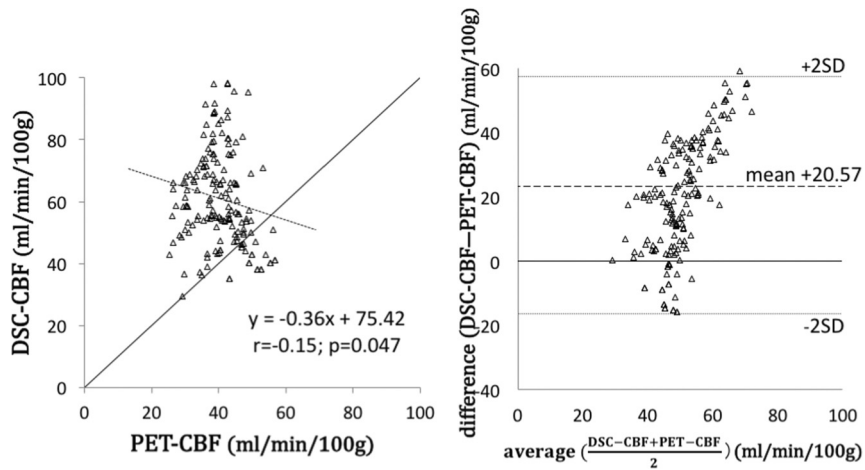

**ON-LINE FIG 2.** The correlation between DSC-CBF and PET-CBF is poor.

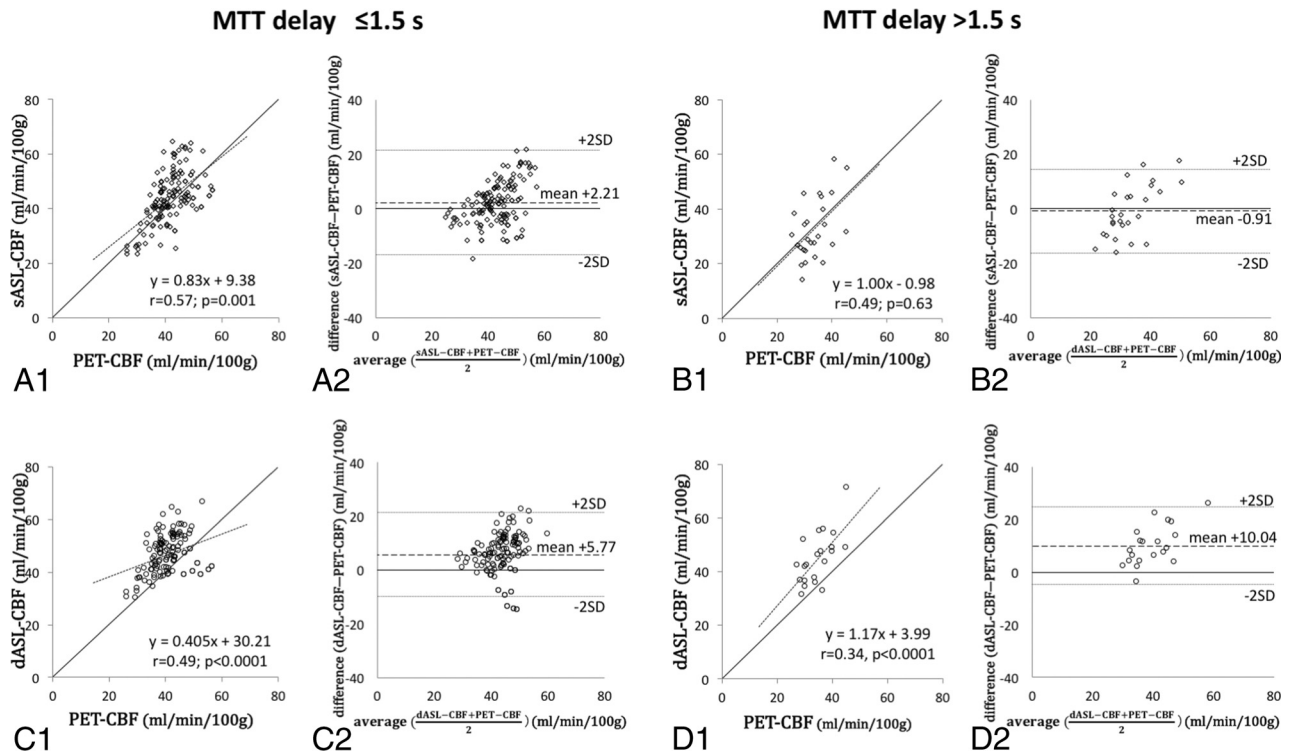

**ON-LINE FIG 3.** The correlation between ASL-CBF and PET-CBF is determined at an MTT delay cutoff of 1.5 seconds. Short ASL-CBF significantly correlates with PET-CBF when the MTT delay is  $\leq 1.5$  seconds (A1–A2).

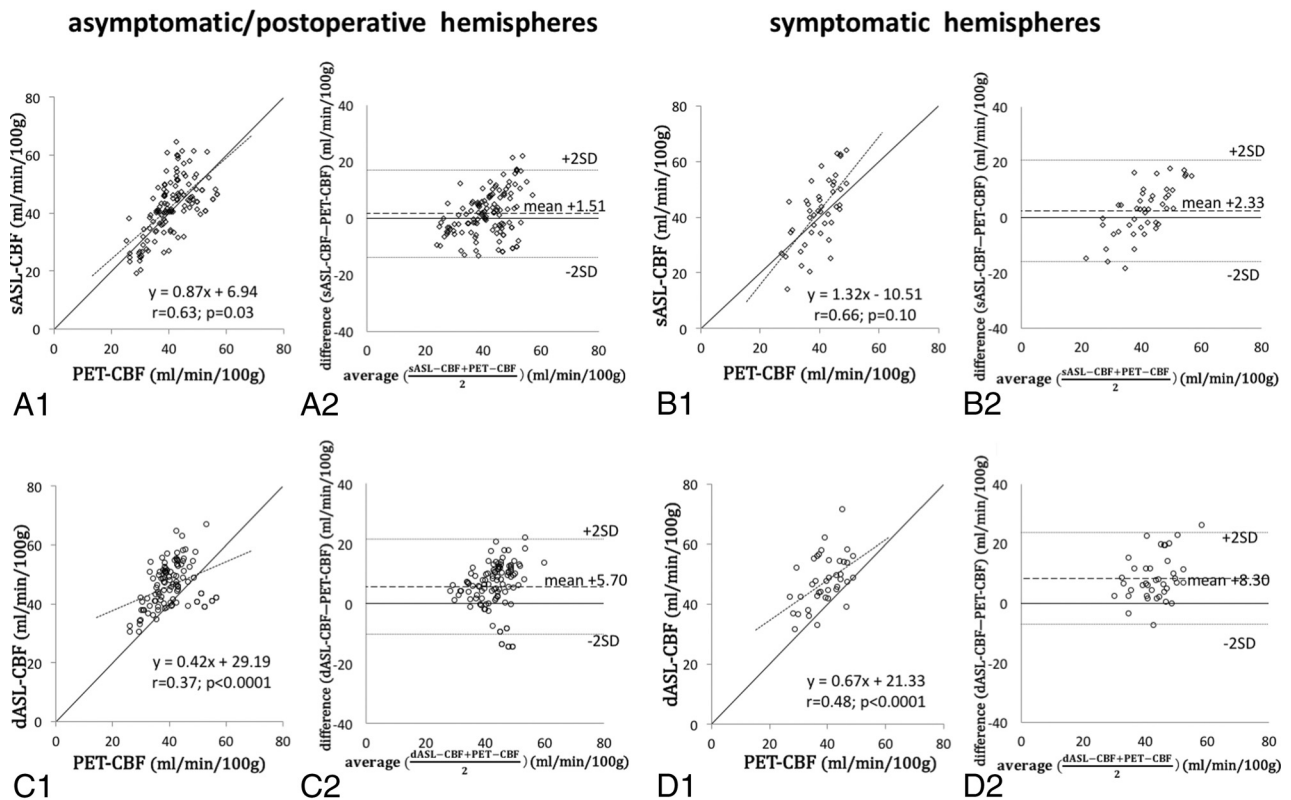

**ON-LINE FIG 4.** The correlation between CBF values of ASL and PET in asymptomatic/postoperative hemispheres and symptomatic sides. CBF values of sASL and PET correlate well in asymptomatic/postoperative hemispheres (A1). Delayed ASL-CBF overestimates PET-CBF (C2, D2), but the correlation is better in symptomatic hemispheres (D1).

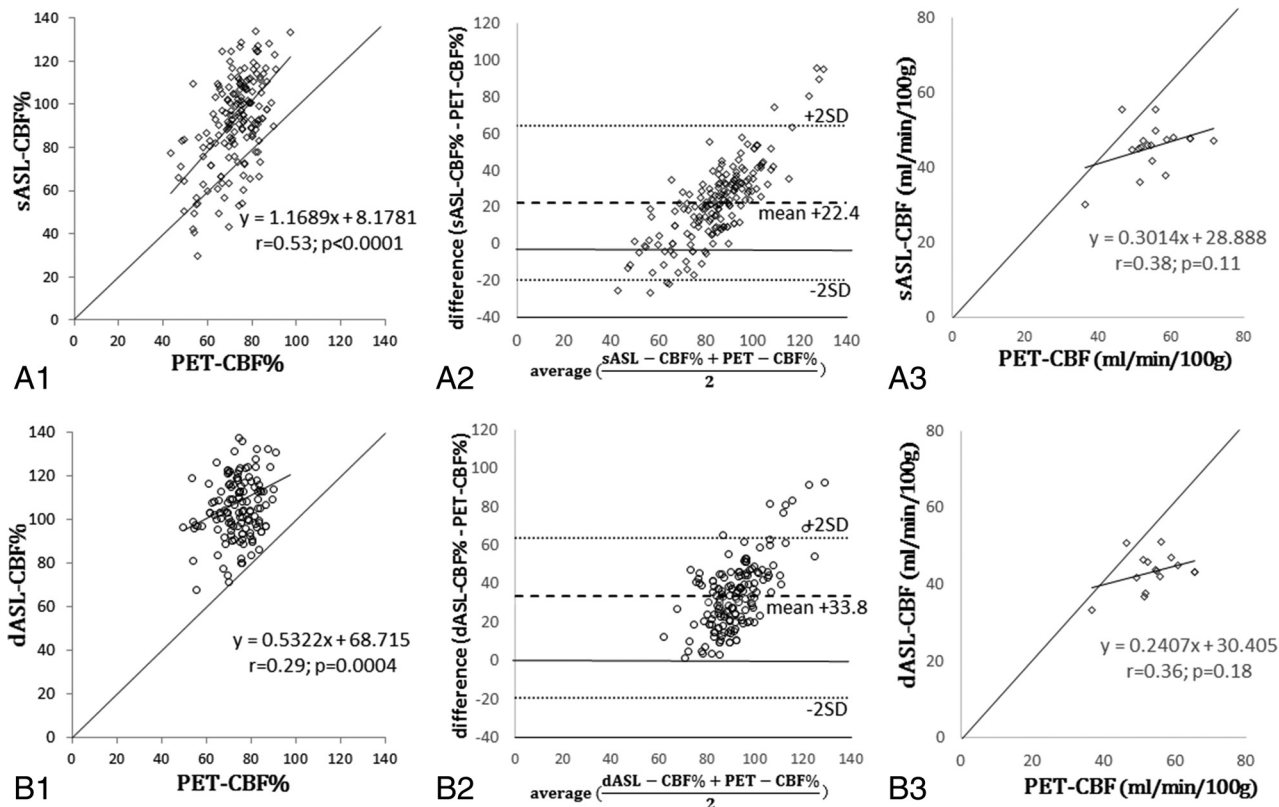

**ON-LINE FIG 5.** The relationship between normalized CBF values of PET and ASL. Both sASL-CBF and dASL-CBF almost overestimate the true CBF. Note that the differences between normalized ASL-CBF and normalized PET-CBF were larger than those between absolute ASL-CBF and absolute PET-CBF (Fig 2).

**On-line Table 1: Summary of patient characteristics**

| Patient No. | Age (yrs) | Sex | Category of the Hemisphere |      | Details of S Category of the Hemisphere | MRA Score |      | MRA Stage |      | Unilateral Disease | Interval between MRI and PET (days) | ROIs Excluded from Analysis |
|-------------|-----------|-----|----------------------------|------|-----------------------------------------|-----------|------|-----------|------|--------------------|-------------------------------------|-----------------------------|
|             |           |     | Right                      | Left |                                         | Right     | Left | Right     | Left |                    |                                     |                             |
| 1           | 36        | F   | S                          | A    | Left hand paresthesia, dysphagia        | 7         | 0    | 3         | 0    | Yes                | 16                                  |                             |
| 2           | 33        | M   | A                          | A    |                                         | 7         | 7    | 3         | 3    |                    | 16                                  |                             |
| 3           | 38        | F   | S                          | A    | Left arm weakness                       | 5         | 4    | 3         | 2    |                    | 34                                  |                             |
| 4           | 41        | M   | A                          | A    |                                         | 4         | 4    | 2         | 2    |                    | 20                                  |                             |
| 5           | 31        | F   | A                          | A    |                                         | 4         | 4    | 2         | 2    |                    | 20                                  |                             |
| 6           | 21        | F   | A                          | S    | Right hand weakness                     | 7         | 5    | 3         | 3    |                    | 6                                   |                             |
| 7           | 42        | F   | A                          | PO   | Right hemiparesis                       | 0         | 7    | 0         | 3    | Yes                | 41                                  | Lt P                        |
| 8           | 37        | M   | PO                         | PO   | Right hand weakness                     | 8         | 8    | 4         | 4    |                    | 34                                  | Lt O, Lt P, Lt T            |
| 9           | 45        | F   | S                          | A    | Left leg weakness                       | 8         | 7    | 4         | 3    |                    | 18                                  |                             |
| 10          | 32        | F   | PO                         | PO   |                                         | 7         | 7    | 3         | 3    |                    | 29                                  |                             |
| 11          | 55        | F   | S                          | A    | Left leg weakness                       | 6         | 2    | 3         | 1    |                    | 15                                  |                             |
| 12          | 55        | F   | PO                         | PO   |                                         | 8         | 8    | 4         | 4    |                    | 34                                  | Lt T, Lt O, Rt O            |
| 13          | 26        | F   | S                          | PO   | Left hand weakness                      | 6         | 8    | 3         | 4    |                    | 19                                  |                             |
| 14          | 35        | M   | A                          | S    | Right hand weakness, dysphagia          | 0         | 4    | 0         | 2    | Yes                | 41                                  |                             |
| 15          | 30        | M   | S                          | A    | Left hand weakness                      | 6         | 6    | 3         | 3    |                    | 20                                  | Rt F                        |
| 16          | 34        | F   | A                          | A    |                                         | 1         | 2    | 0         | 1    |                    | 23                                  |                             |
| 17          | 42        | F   | S                          | A    | Left hemiparesis                        | 4         | 7    | 2         | 3    |                    | 20                                  |                             |
| 18          | 30        | F   | A                          | A    |                                         | 7         | 7    | 3         | 3    |                    | 20                                  |                             |

**Note:**—A indicates asymptomatic; F, frontal; Lt, left; O, occipital; P, parietal; PO, postoperative; Rt, right; S, symptomatic; T, temporal.

**On-line Table 2: Quantitative CBF values of ASL and PET**

|                            | sASL-CBF (mL/min/100 g) |             | dASL-CBF (mL/min/100 g) |             | PET-CBF (mL/min/100 g) |             |
|----------------------------|-------------------------|-------------|-------------------------|-------------|------------------------|-------------|
|                            | Mean                    | 95% CI      | Mean                    | 95% CI      | Mean                   | 95% CI      |
| All cortical regions       | 42.19                   | 40.62–43.76 | 46.58                   | 45.32–47.84 | 40.47                  | 39.43–41.51 |
| Tmax (s)                   |                         |             |                         |             |                        |             |
| ≤6.0                       | 44.30                   | 42.63–45.97 | 46.84                   | 45.40–48.29 | 41.49                  | 40.29–42.68 |
| >6.0                       | 34.99                   | 31.93–38.05 | 45.79                   | 43.11–48.47 | 37.01                  | 35.23–38.80 |
| TTP (s)                    |                         |             |                         |             |                        |             |
| ≤4.0                       | 43.27                   | 41.76–44.78 | 47.08                   | 45.85–48.32 | 41.06                  | 40.00–42.11 |
| >4.0                       | 28.99                   | 22.65–35.33 | 41.45                   | 35.04–47.85 | 33.30                  | 30.41–36.19 |
| MTT (s)                    |                         |             |                         |             |                        |             |
| ≤4.0                       | 44.89                   | 43.25–46.52 | 47.34                   | 45.87–48.79 | 42.35                  | 41.18–43.52 |
| >4.0                       | 36.30                   | 33.30–39.31 | 45.00                   | 42.56–47.43 | 36.36                  | 34.70–38.02 |
| MTT delay (s)              |                         |             |                         |             |                        |             |
| ≤1.5                       | 43.98                   | 42.45–45.51 | 48.87                   | 45.57–52.17 | 41.77                  | 40.73–42.81 |
| >1.5                       | 32.60                   | 28.22–36.96 | 44.87                   | 40.49–49.25 | 33.51                  | 31.36–35.66 |
| ≤2.0                       | 43.00                   | 41.45–44.55 | 46.86                   | 45.61–48.10 | 41.01                  | 39.97–42.05 |
| >2.0                       | 30.40                   | 23.51–37.30 | 42.38                   | 33.42–51.43 | 32.60                  | 28.96–36.24 |
| Asymptomatic/postoperative | 42.20                   | 40.46–43.93 | 46.22                   | 44.80–47.65 | 40.68                  | 39.43–41.95 |
| Symptomatic                | 42.17                   | 38.55–45.79 | 47.56                   | 44.83–50.28 | 39.84                  | 38.04–41.65 |
| Cerebellum                 | 45.57                   | 42.50–48.63 | 43.44                   | 40.75–46.12 | 55.33                  | 51.42–59.24 |

**On-line Table 3: Summary of the statistical analysis between CBF values of sASL and PET<sup>a</sup>**

| sASL-CBF vs PET-CBF        | Correlation Coefficient ( <i>r</i> ) | P Value (Correlation) | z Value <sup>c</sup> | Difference (sASL-CBF Minus PET-CBF) (mL/min/100 g) |               | P Value (Paired <i>t</i> Test) |
|----------------------------|--------------------------------------|-----------------------|----------------------|----------------------------------------------------|---------------|--------------------------------|
|                            |                                      |                       |                      | Mean                                               | 95% CI        |                                |
| All cortical areas         | 0.63                                 | .01 <sup>b</sup>      |                      | 1.72                                               | 0.50 to 2.94  |                                |
| Tmax (s)                   |                                      |                       |                      |                                                    |               |                                |
| ≤6.0                       | 0.61                                 | <.0001 <sup>b</sup>   | 0.82                 | 2.82                                               | 1.48 to 4.16  | .002 <sup>b</sup>              |
| >6.0                       | 0.50                                 | .93                   |                      | -2.02                                              | -4.68 to 0.63 |                                |
| TTP (s)                    |                                      |                       |                      |                                                    |               |                                |
| ≤4.0                       | 0.58                                 | .001 <sup>b</sup>     | 0.80                 | 2.21                                               | 0.97 to 3.46  | .01 <sup>b</sup>               |
| >4.0                       | 0.73                                 | .07                   |                      | -4.31                                              | -8.99 to 0.38 |                                |
| MTT (s)                    |                                      |                       |                      |                                                    |               |                                |
| ≤4.0                       | 0.54                                 | .001 <sup>b</sup>     | 0.53                 | 2.53                                               | 1.13 to 3.94  | .07                            |
| >4.0                       | 0.60                                 | .96                   |                      | -0.06                                              | -2.46 to 2.35 |                                |
| MTT delay (s)              |                                      |                       |                      |                                                    |               |                                |
| ≤1.5                       | 0.57                                 | .001 <sup>b</sup>     | 0.46                 | 2.21                                               | 0.94 to 3.28  | .12                            |
| >1.5                       | 0.49                                 | .63                   |                      | -0.91                                              | -4.81 to 2.89 |                                |
| ≤2.0                       | 0.59                                 | .002 <sup>b</sup>     | 0.56                 | 1.95                                               | -3.50 to 7.75 | .10                            |
| >2.0                       | 0.70                                 | .35                   |                      | -2.90                                              | -6.01 to 4.47 |                                |
| Asymptomatic/postoperative | 0.63                                 | .03 <sup>b</sup>      | 0.30                 | 1.51                                               | 0.15 to 2.87  | .60                            |
| Symptomatic                | 0.66                                 | .10                   |                      | 2.33                                               | -0.45 to 5.11 |                                |

<sup>a</sup> See the Materials and Methods for details of sASL, Tmax, and MTT delay.

<sup>b</sup> *P* < .05 regarded to be significant.

<sup>c</sup> *z* > 1.96 regarded to be significant.

**On-line Table 4: Summary of the statistical analysis between CBF values of dASL and PET<sup>a</sup>**

| dASL-CBF vs PET-CBF        | Correlation Coefficient ( <i>r</i> ) | P Value (Correlation) | z Value           | Difference (dASL-CBF Minus PET-CBF) (mL/min/100 g) |            | P Value (Paired <i>t</i> Test) |
|----------------------------|--------------------------------------|-----------------------|-------------------|----------------------------------------------------|------------|--------------------------------|
|                            |                                      |                       |                   | Mean                                               | 95% CI     |                                |
| All cortical areas         | 0.39                                 | <.0001 <sup>b</sup>   |                   | 6.39                                               | 5.10–7.67  |                                |
| Tmax (s)                   |                                      |                       |                   |                                                    |            |                                |
| ≤6.0                       | 0.34                                 | <.0001 <sup>b</sup>   | 1.42              | 5.48                                               | 3.95–7.00  | .01 <sup>b</sup>               |
| >6.0                       | 0.56                                 | <.0001 <sup>b</sup>   |                   | 9.16                                               | 6.92–11.40 |                                |
| TTP (s)                    |                                      |                       |                   |                                                    |            |                                |
| ≤4.0                       | 0.30                                 | <.0001 <sup>b</sup>   | 2.54 <sup>c</sup> | 7.94                                               | 4.85–7.58  | .38                            |
| >4.0                       | 0.82                                 | .002 <sup>b</sup>     |                   | 8.24                                               | 3.77–12.52 |                                |
| MTT (s)                    |                                      |                       |                   |                                                    |            |                                |
| ≤4.0                       | 0.20                                 | <.0001 <sup>b</sup>   | 3.60              | 5.56                                               | 3.86–7.27  | .04 <sup>b</sup>               |
| >4.0                       | 0.70                                 | <.0001 <sup>b</sup>   |                   | 8.12                                               | 6.37–9.87  |                                |
| MTT delay (s)              |                                      |                       |                   |                                                    |            |                                |
| ≤1.5                       | 0.34                                 | <.0001 <sup>b</sup>   | 1.64              | 5.77                                               | 4.39–7.16  | .02 <sup>b</sup>               |
| >1.5                       | 0.65                                 | <.0001 <sup>b</sup>   |                   | 10.04                                              | 6.67–13.41 |                                |
| ≤2.0                       | 0.33                                 | <.0001 <sup>b</sup>   | 2.80 <sup>c</sup> | 6.24                                               | 4.90–7.57  | .37                            |
| >2.0                       | 0.91                                 | .008 <sup>b</sup>     |                   | 8.64                                               | 2.98–14.30 |                                |
| Asymptomatic/postoperative | 0.37                                 | <.0001 <sup>b</sup>   | 0.72              | 5.70                                               | 4.19–7.21  | .08                            |
| Symptomatic                | 0.48                                 | <.0001 <sup>b</sup>   |                   | 8.27                                               | 5.79–10.75 |                                |

<sup>a</sup> See the Materials and Methods for details of dASL, Tmax, and MTT delay.

<sup>b</sup> *P* < .05 regarded to be significant.

<sup>c</sup> *z* > 1.96 regarded to be significant.
